# Supplementary material for: Pathogen‐induced pH changes regulate the growth‐defense balance in plants
Source: PubMed Central journal article supplement — EMBO J. 2019 Nov 18;38(24):e101822. doi: 10.15252/embj.2019101822 (PMC6912046; doi:10.15252/embj.2019101822), 2019-11-18
Supplement: EMBJ-38-e101822-s001.pdf [file EMBJ-38-e101822-s001.pdf]

## Expanded View Figures

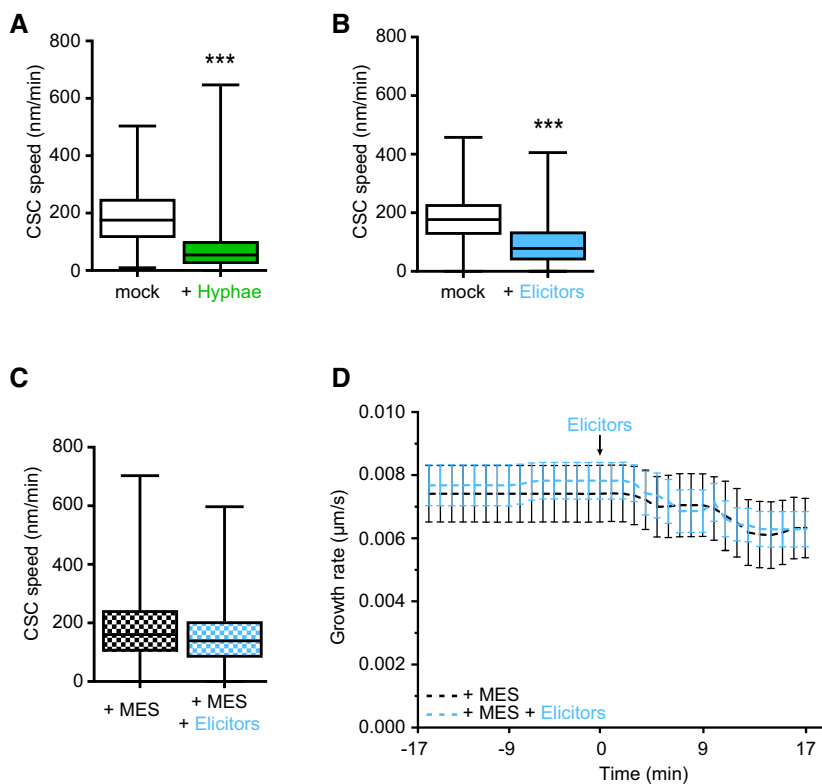

**Figure EV1. Fo5176 hyphae and elicitors cause an immediate speed decrease of plasma membrane localized cellulose synthase complexes.**

**A** GFP-CesA3 speed at the plasma membrane of WT (Col-0) root cells 5 min after half MS treatment or Fo5176 contact (as depicted in Fig 1A). Box plots: centerlines show the medians; box limits indicate the 25<sup>th</sup> and 75<sup>th</sup> percentiles; whiskers extend to the minimum and maximum.  $N \geq 369$  particles from 6 cells and 6 roots and three independent experiments; Welch's unpaired *t*-test; \*\*\**P*-value  $\leq 0.001$ .

**B** GFP-CesA3 speed at the plasma membrane of WT (Col-0) root cells 5 min after half MS or half MS + elicitor treatment (as depicted in Fig 1F). Box plots as described in (A).  $N \geq 647$  particles from 9 cells and 6 roots and three independent experiments; Welch's unpaired *t*-test; \*\*\**P*-value  $\leq 0.001$ .

**C** GFP-CesA3 speed at the plasma membrane of WT (Col-0) root cells 5 min after being exposed to half MS + 5 mM MES and half MS + 5 mM MES + elicitor treatment (as depicted in Fig 2A). Box plots as described in (A).  $N \geq 786$  particles from 13 cells and 11 roots and three independent experiments.

**D** Growth rate of WT (Col-0) roots exposed to fungal elicitors and 5 mM MES. After 17 min of growth in half MS + 5 mM MES, H<sub>2</sub>O or elicitors were added and the growth rate was measured for an additional 17 min. Average growth rate before treatment (−17 to 0 min): 5 mM MES:  $0.0074 \pm 0.0009$  µm/s; elicitors + 5 mM MES:  $0.0068 \pm 0.0010$  µm/s. Average growth rate after treatment (0–17 min): 5 mM MES:  $0.0077 \pm 0.0024$  µm/s; elicitors + 5 mM MES:  $0.0069 \pm 0.0020$  µm/s. Values are mean  $\pm$  SEM,  $N \geq 11$  seedlings from three independent experiments. Welch's unpaired *t*-test for roots before and after elicitor treatment; *P*-value = 0.33.

Source data are available online for this figure.

**Figure EV2. Fo5176-induced depletion of the cellulose synthase machinery and acidification of the plasma membrane interface, measured with newly designed sensors, can be buffered.**

- A Representative images of 6-day-old WT (Col-0) root epidermal and cortex cells expressing apo-pHusion or SYP122-pHusion. Much less intracellular signal of pHusion is observed for SYP122-pHusion than for apo-pHusion. Scale bar = 20  $\mu$ m.
- B *In vivo* calibration of SYP122-pHusion in 6-day-old roots. Dots represent individual samples with  $N \geq 5$  seedlings per standard buffer. Data points were fitted using sigmoidal regression.
- C Representative images of 6-day-old WT (Col-0) root epidermal and cortex cells expressing pHGFP-Lti6b. Cell walls of seedlings were counterstained with 3  $\mu$ g/ml propidium iodide to illustrate plasma membrane localization of pHGFP-Lti6b of two adjacent cells (white arrow). Scale bars = 10  $\mu$ m.
- D *In vivo* calibration of pHGFP-Lti6b in 6-day-old roots. Dots represent individual samples with  $N \geq 5$  seedlings per standard buffer. Data points were fitted using sigmoidal regression.
- E Cytoplasmic pH variation of WT roots expressing the pH<sub>cyto</sub> free pHGFP sensor over time, either in half MS or in half MS + 5 mM MES. Imaging started 5 min before either H<sub>2</sub>O or a fungal elicitor mix was added (0 min). Values are mean  $\pm$  SEM,  $N \geq 12$  seedlings from three independent experiments. RM two-way ANOVA on half MS + H<sub>2</sub>O versus half MS + elicitors:  $P = 0.42$  (treatment),  $P = 0.06$  (time),  $P = 0.08$  (treatment  $\times$  time).
- F Apoplastic  $\Delta$ pH of WT roots expressing the pH<sub>apo</sub> SYP122-pHusion sensor over time, either in half MS or in half MS + 5 mM MES. Imaging started 5 min before either H<sub>2</sub>O or a fungal elicitors were added (0 min). Values are mean  $\pm$  SEM,  $N \geq 16$  seedlings from three independent experiments. RM two-way ANOVA on half MS + H<sub>2</sub>O versus half MS + elicitors:  $P \leq 0.001$  (treatment),  $P \leq 0.05$  (time),  $P \leq 0.001$  (treatment  $\times$  time).
- G Cortical  $\Delta$ pH of WT roots expressing the pH<sub>cortical</sub> pHGFP-Lti6b sensor over time, either in half MS or in half MS + 5 mM MES. Imaging started 5 min before either H<sub>2</sub>O or a fungal elicitor mix was added (0 min). Mixed-effects model on half MS + H<sub>2</sub>O versus half MS + elicitors:  $P \leq 0.01$  (treatment),  $P \leq 0.001$  (time),  $P \leq 0.001$  (treatment  $\times$  time).
- H Apoplastic pH of WT roots expressing the pH<sub>apo</sub> SYP122-pHusion sensor over time in half MS. Imaging started 5 min before either H<sub>2</sub>O (mock) or 1 mM chitin were added (0 min). Values are mean  $\pm$  SEM,  $N = 15$  seedlings from three independent experiments. RM two-way ANOVA on half MS + H<sub>2</sub>O versus half MS + chitin:  $P \leq 0.05$  (treatment),  $P \leq 0.001$  (time),  $P \leq 0.001$  (treatment  $\times$  time). This chitin assay was done simultaneously to the elicitor treatments (Fig 2E); therefore, they share the same mock (H<sub>2</sub>O) curve.

Source data are available online for this figure.

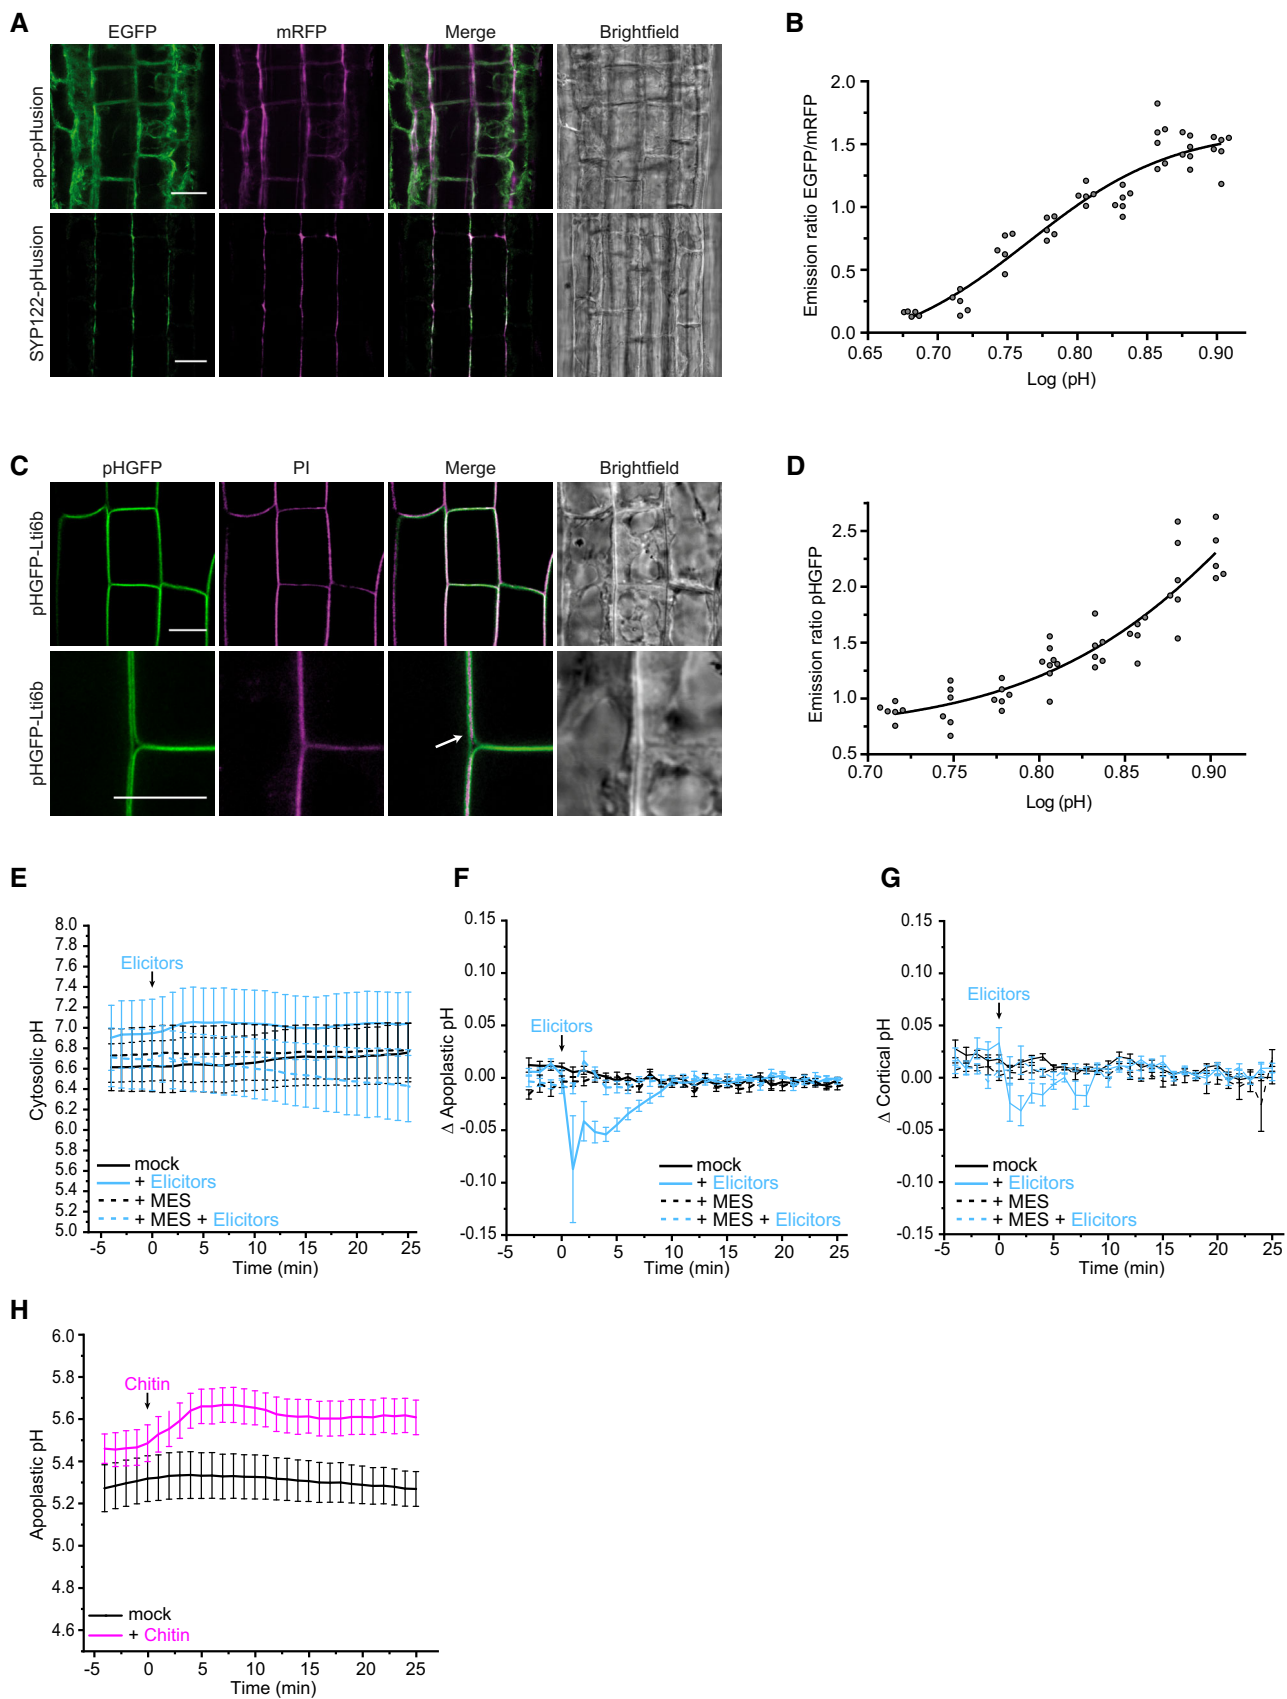

Figure EV2.

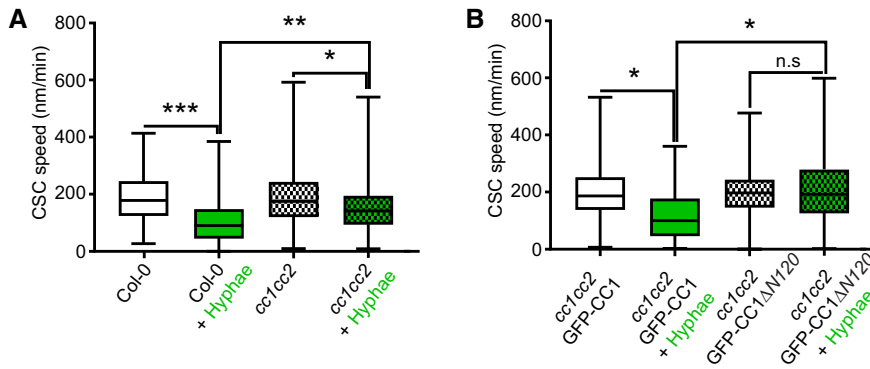

**Figure EV3. The speed of plasma membrane localized cellulose synthase complexes is differentially affected by Fo5176 hyphae contact in *cc1cc2* mutants compared to wild-type.**

**A** CSC speed at the plasma membrane of WT (Col-0) and *cc1cc2* root cells, as depicted in Fig 3A and B, upon Fo5176 hyphae contact. Box plots: centerlines show the medians; box limits indicate the 25<sup>th</sup> and 75<sup>th</sup> percentiles; whiskers extend to the minimum and maximum.  $N \geq 270$  particles from 8 cells and 7 roots and three independent experiments; Welch's unpaired *t*-test; \**P*-value  $\leq 0.05$ , \*\**P*-value  $\leq 0.01$ , \*\*\**P*-value  $\leq 0.001$ .

**B** GFP-CC1 and GFP-CC1ΔN120 speed (as proxy for the CSC) at the plasma membrane of *cc1cc2* root cells upon Fo5176 hyphae contact, as depicted in Fig 3F and G. Box plots as described in (A).  $N \geq 288$  particles from 12 cells and 7 roots and three independent experiments; Welch's unpaired *t*-test; \**P*-value  $\leq 0.05$ , n.s. = not significant.

Source data are available online for this figure.

**Figure EV4. *cc1cc2* resistance to Fo5176 root colonization can be mimicked in wild-type plants by buffering the growth media.**

- A** Root elongation at various days post-transfer to Fo5176 spore containing plates. Values are mean  $\pm$  SEM,  $N \geq 33$  plants from three independent experiments. RM two-way ANOVA:  $P \leq 0.01$  (genotype),  $P \leq 0.001$  (time),  $P \leq 0.05$  (genotype  $\times$  time).
- B** Left panel: Monosaccharide elution profile of a 1  $\mu$ g/ml standard (black) compared to 1:10 dilutions of hydrolyzed samples (Saeman hydrolysis, as indicated in methods section) derived from roots after 7 days of either mock (pink) or Fo5176 treatment (blue). The N-acetylglucosamine (GlcNAc) peak (4) is only identifiable in hydrolyzed infected samples (blue). Right panel: Strong and weak hydrolyses of fungal-derived cell wall material indicate negligible presence of glucose non-extractable with the matrix hydrolysis method, as the glucose peak is similar in either hydrolysis method. In plants, there is a clear difference between the glucose peaks in either hydrolysis method.
- C** Quantification of the N-acetylglucosamine peak of Fo5176 pSIX1::GFP-infected roots derived from the fungal cell wall as shown in (B). Box plots: centerlines show the medians; box limits indicate the 25<sup>th</sup> and 75<sup>th</sup> percentiles; whiskers extend to the minimum and maximum.  $N \geq 5$  biological replicates; Welch's unpaired *t*-test;  $P = 0.34$ .
- D** Quantification of Fo5176 colonies developing after surface sterilization of infected roots. Box plots as described in (C).  $N = 5$  biological replicates; Welch's unpaired *t*-test;  $P = 0.75$ .
- E** Vascular penetration of WT (Col-0) and *cc1cc2* plants at various days post-inoculation with Fo5176 pSIX1::GFP spores with or without 5 mM MES. Values are mean  $\pm$  SEM,  $N \geq 33$  plants from three independent experiments. RM two-way ANOVA (Col-0 half MS versus Col-0 half MS + MES):  $P \leq 0.001$  (genotype),  $P \leq 0.001$  (time),  $P \leq 0.001$  (genotype  $\times$  time).
- F** Root elongation of WT (Col-0) and *cc1cc2* plants at various days post-inoculation with Fo5176 pSIX1::GFP spores with or without 5 mM MES. Values are mean  $\pm$  SEM,  $N \geq 33$  plants from three independent experiments. RM two-way ANOVA (Col-0 half MS versus Col-0 half MS + MES):  $P \leq 0.001$  (genotype),  $P \leq 0.001$  (time),  $P \leq 0.001$  (genotype  $\times$  time).
- G** Cellulose content of roots 7 days post-transfer to Fo5176 pSIX1::GFP spore containing half MS + 5 mM MES plates or post-transfer to control (half MS + 5 mM MES) plates, represented as  $\mu$ g of D-glucose derived from crystalline cellulose per mg of dried alcohol-insoluble residue (AIR). Box plots as described in (C).  $N \geq 5$  biological replicates; 2 technical replicates per biological replicate. Welch's unpaired *t*-test; \*\**P*-value  $\leq 0.01$ .
- H** CSC ( $N \geq 27$  cells from 11 roots) and microtubule ( $N \geq 17$  cells from 7 roots) density and CSC speed ( $N \geq 366$  particles from 17 cells and 9 roots) at the plasma membrane of WT (Col-0) or *cc1cc2* root cells expressing YFP-CesA6 and mCh-TUA5 grown on half MS + 5 mM MES. Data are from three independent experiments. Box plots as described in (C). Welch's unpaired *t*-test indicates no significant difference for all measurements.
- I** Quantification of the N-acetylglucosamine peak of Fo5176 infected plants grown on half MS + 5 mM MES derived from the fungal cell wall as shown in (B). Box plots as described in (C).  $N = 3$  biological replicates; Welch's unpaired *t*-test;  $P = 0.41$ .

Source data are available online for this figure.

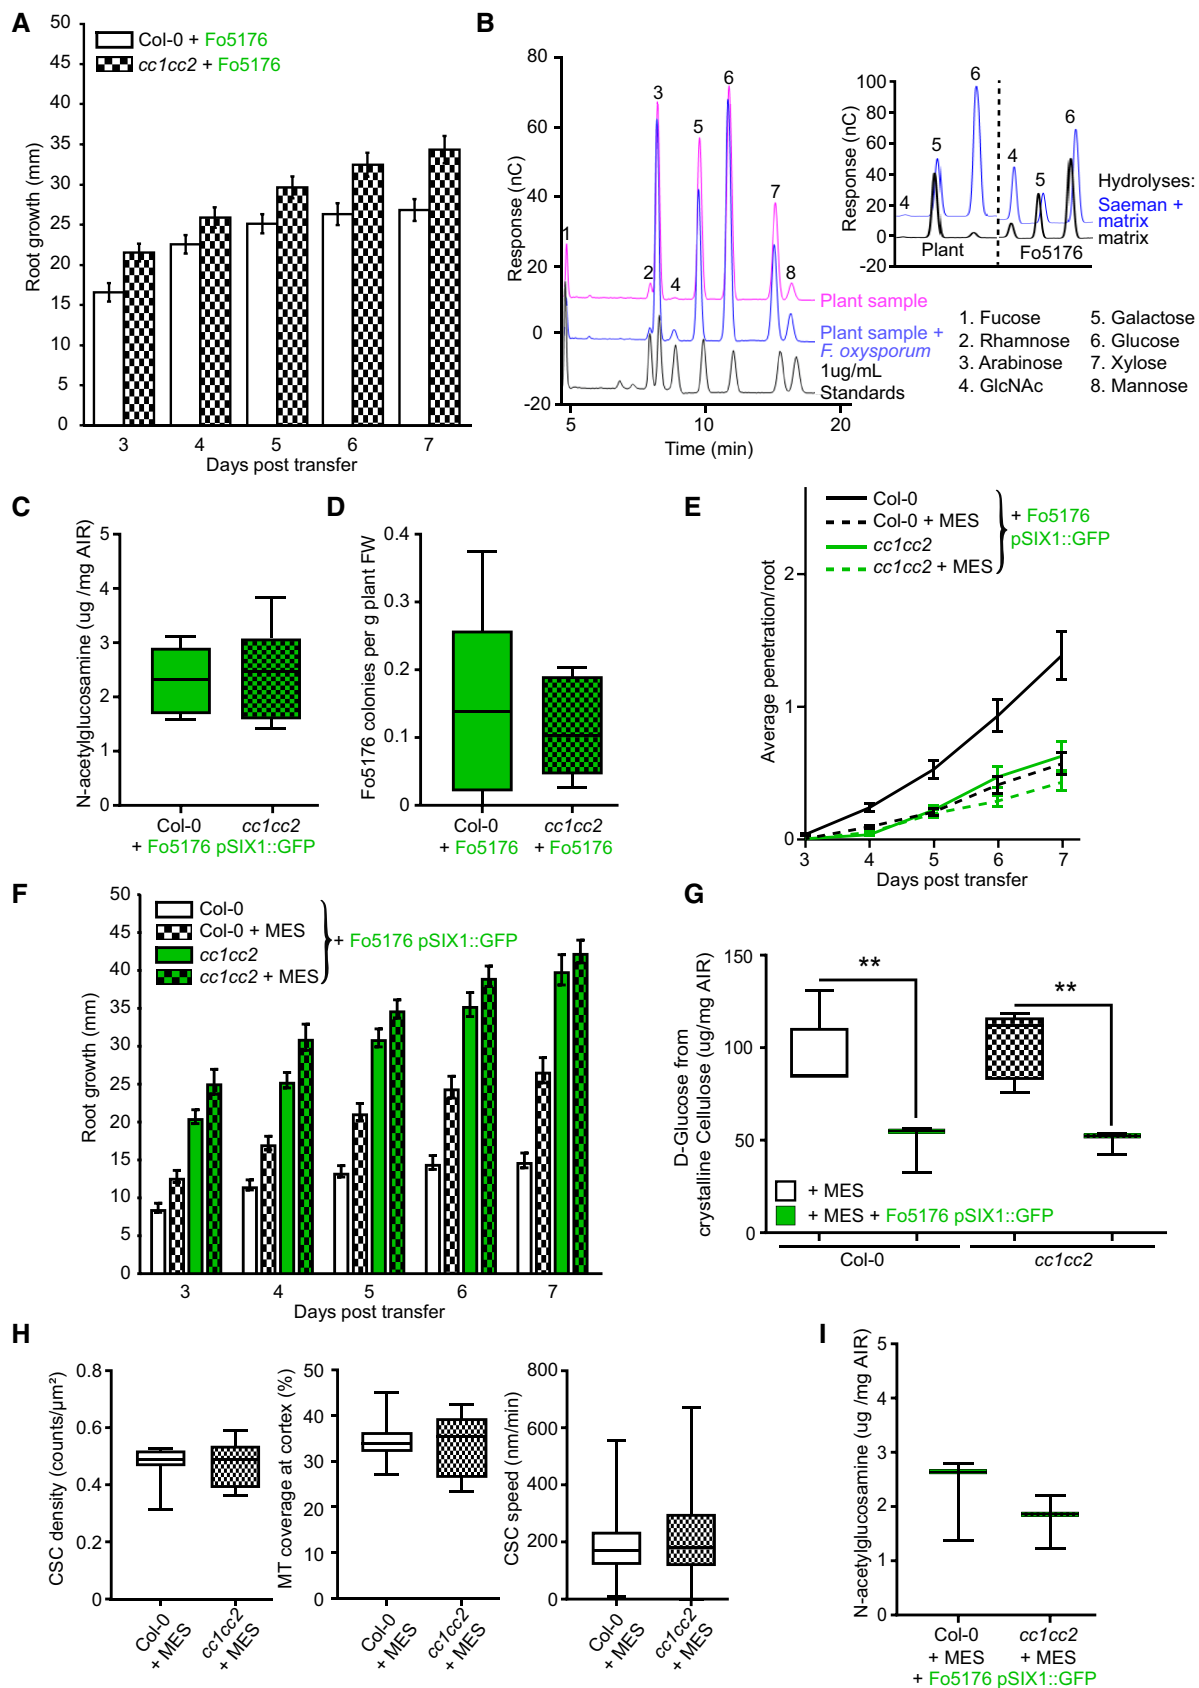

Figure EV4.

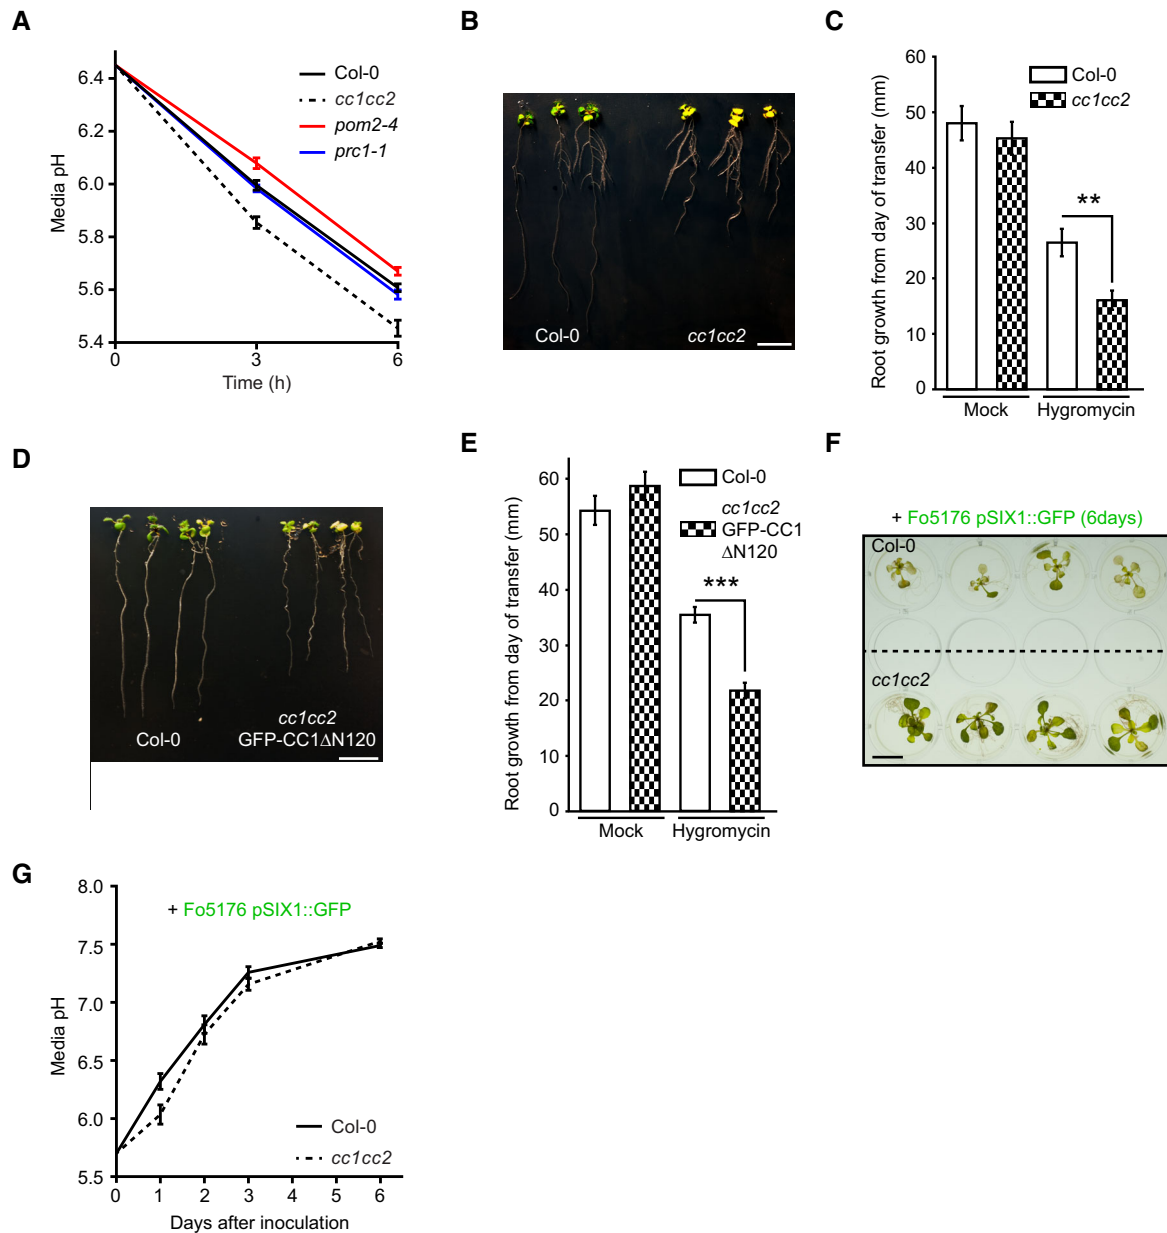

**Figure EV5. *cc1cc2* mutants rapidly acidify the media, are hypersensitive to hygromycin B, and show a delay of Fo5176-induced media alkalization.**

A Media pH development over time when 10-day-old WT (Col-0), *cc1cc2*, *pom2-4*, and *prc1-1* plants were transferred to a liquid, alkaline media (pH 6.45). Values are mean  $\pm$  SEM,  $N \geq 17$  plants from three independent experiments. Welch's unpaired *t*-test versus Col-0 at 6 h: *cc1cc2* *P*-value  $\leq 0.001$ ; *pom2-4* *P*-value  $\leq 0.01$ ; *prc1-1* *P*-value = 0.29.

B Representative image of WT (Col-0) and *cc1cc2* plants 7 days post-transfer to half MS + 5  $\mu$ g/ml hygromycin B plates. Scale bar = 10 mm.

C Root growth of plants grown as in (B). Values are mean  $\pm$  SEM,  $N \geq 15$  plants from three independent experiments. Welch's unpaired *t*-test; \*\**P*-value  $\leq 0.01$ .

D Representative image of WT (Col-0) and *cc1cc2* GFP-CC1ΔN120 plants 7 days post-transfer to half MS + 5  $\mu$ g/ml hygromycin B plates. Scale bar = 10 mm.

E Root growth of plants grown as in (D). Values are mean  $\pm$  SEM,  $N \geq 16$  plants from three independent experiments. Welch's unpaired *t*-test; \*\*\**P*-value  $\leq 0.001$ .

F Representative image of WT (Col-0) and *cc1cc2* plants 7 days post-inoculation with Fo5176 pSIX1::GFP spores in liquid half MS media. Scale bar = 10 mm.

G Media pH development of an experiment as depicted in (F). Values are mean  $\pm$  SEM,  $N = 36$  plants from three independent experiments. RM two-way ANOVA: *P* = 0.069 (genotype), *P*  $\leq 0.001$  (time), *P*  $\leq 0.05$  (genotype  $\times$  time).

Source data are available online for this figure.
